# Supplementary material
Source: PubMed Central journal article supplement (PMC4706810)
Supplement: NIHMS744310-supplement.pdf [file NIHMS744310-supplement.pdf]

**SUPPLEMENTAL INFORMATION**

**Bradley et al. "Structural Constraints of Vaccine-Induced Tier-2 Autologous HIV Neutralizing Antibodies Targeting the Receptor Binding Site." (2015)**

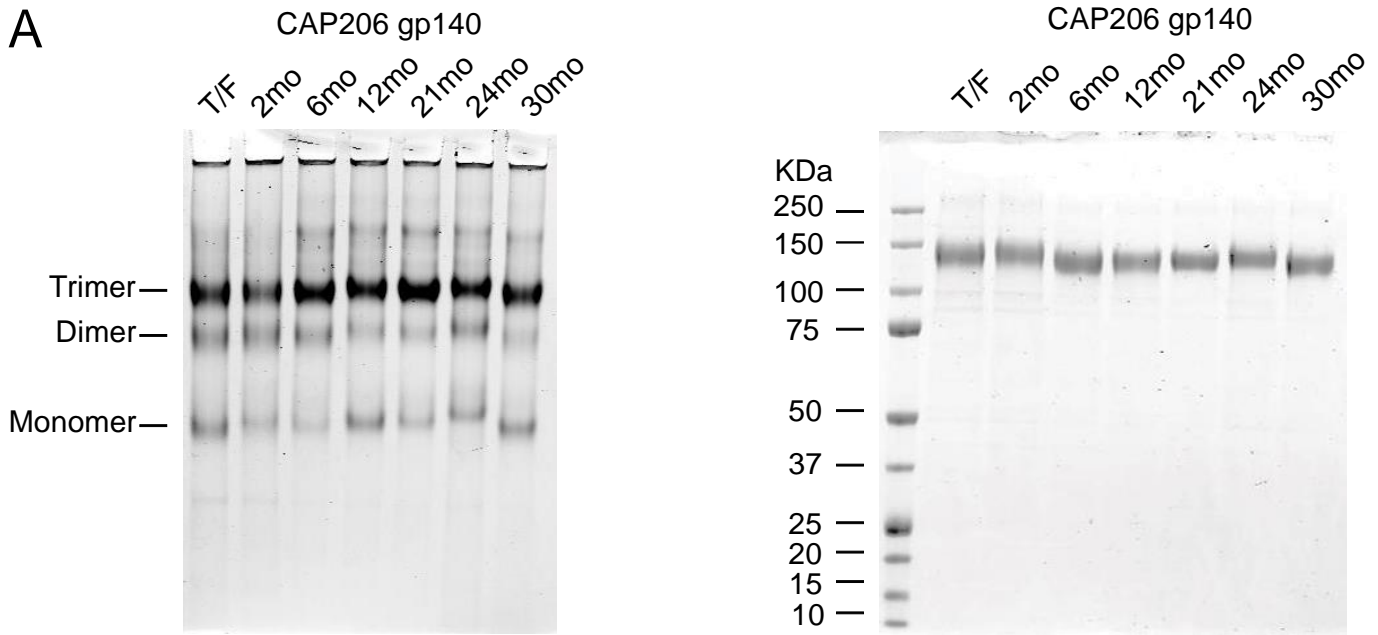

Blue Native Page

SDS-Page; Reducing

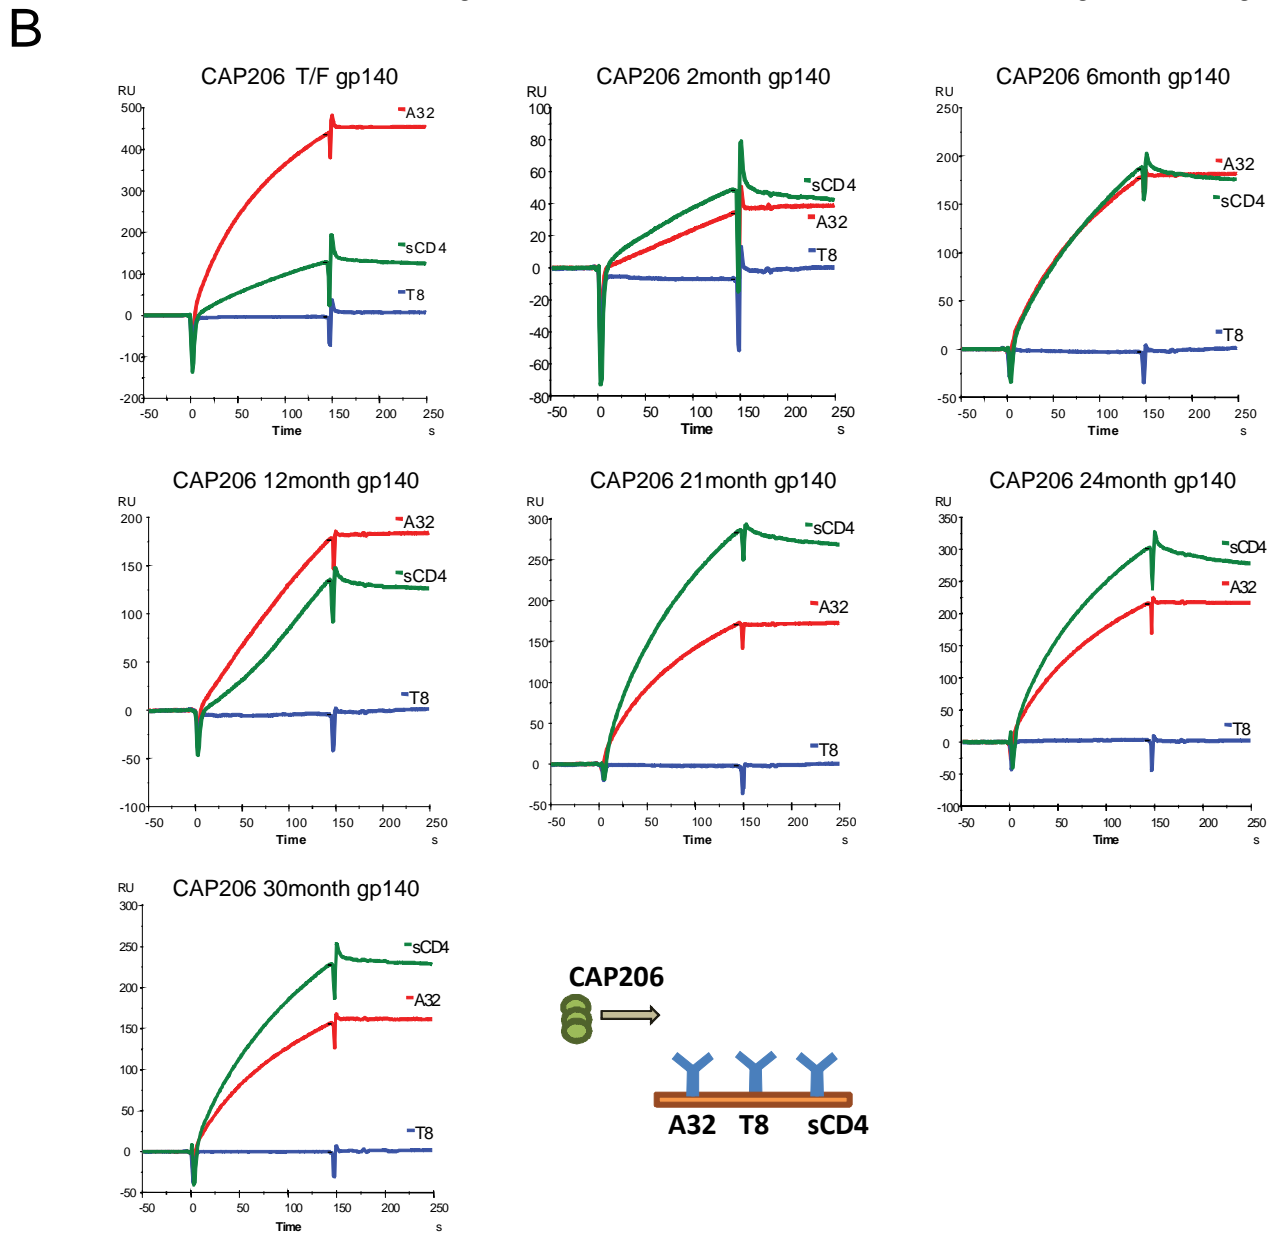

**Figure S1. Expression and Purification of CAP206 Env gp140 Proteins, Related to Figure 1.** (A) Blue-native PAGE and SDS-PAGE of the 7 CAP206 Envs used as immunogens. (B) Binding of sCD4, A32 and control mAb T8 to each of the CAP206 Envs by SPR.

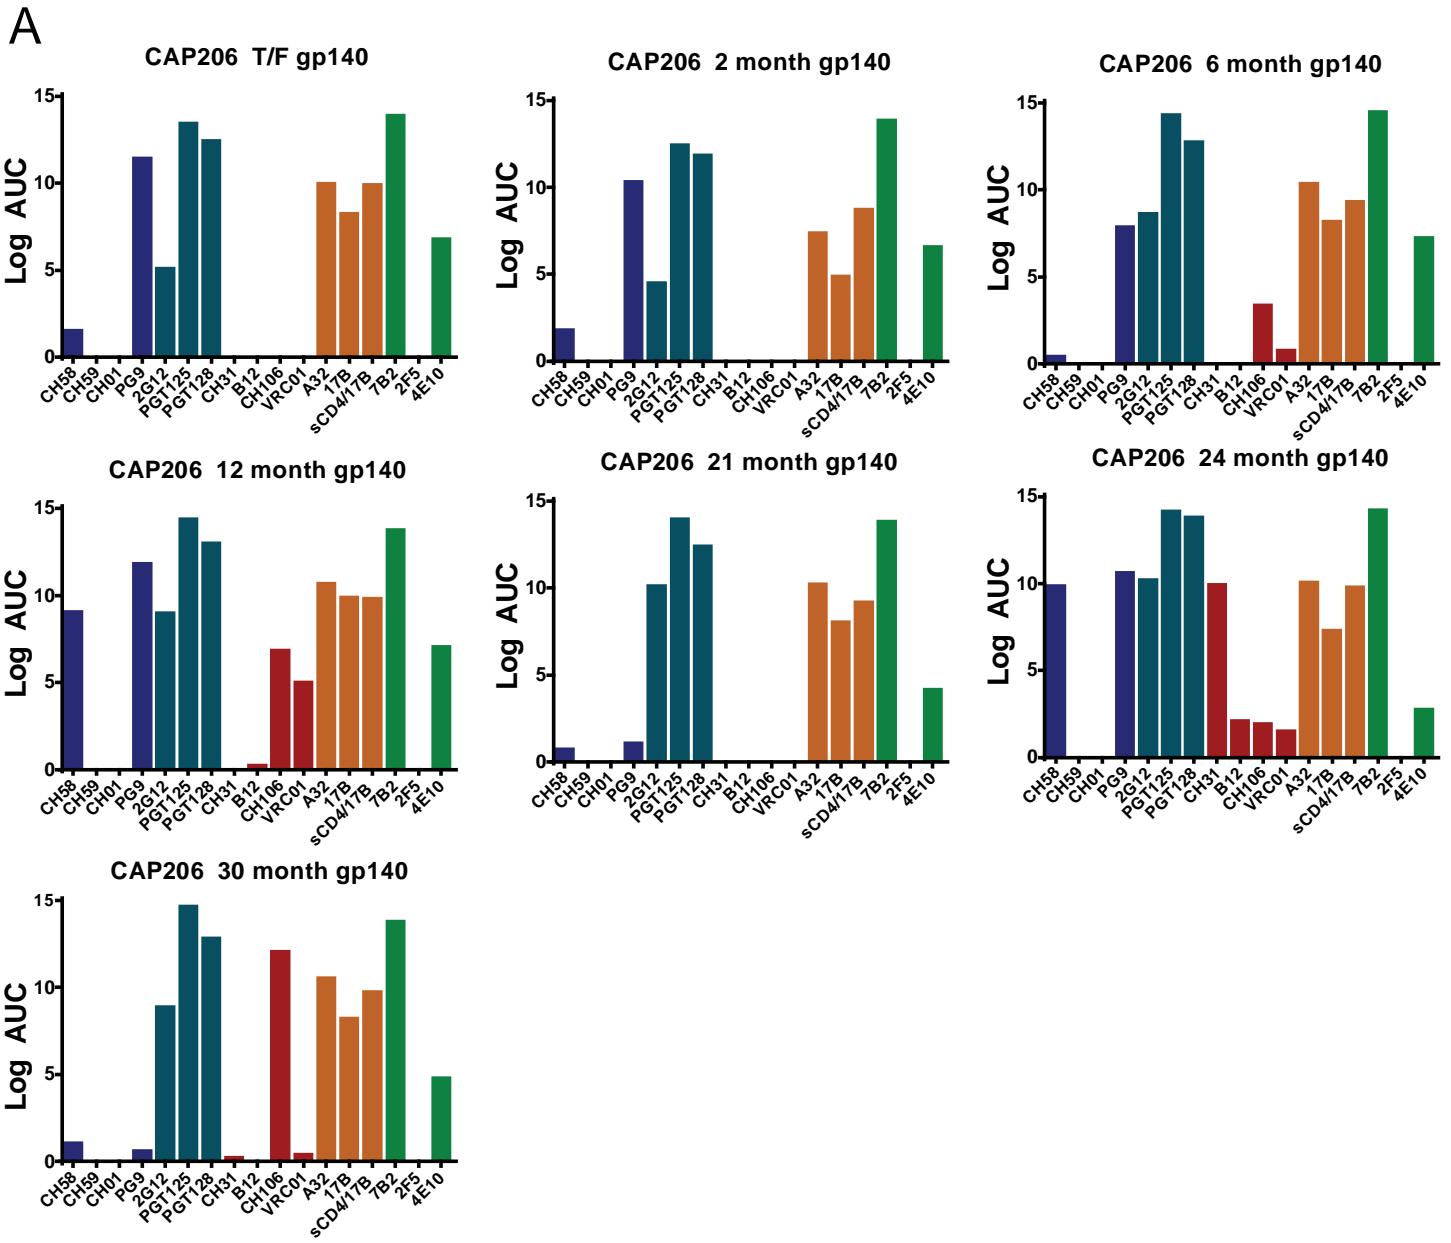

**Figure S2. CAP206 Envs can Bind bnAbs Isolated from Infected Individuals, Related to Figure 1.** Binding of bnAbs to the 7 CAP206 gp140 immunogens by ELISA (Dark blue, V1/V2; Aqua, V3-glycan; Red, CD4bs; Orange, Other; Green, gp41).

A

IC50 ( $\mu\text{g}/\text{mL}$ ) in TZM-bl cells

| Virus ID       |  | IC50 ( $\mu\text{g}/\text{mL}$ ) in TZM-bl cells |       |        |        |        |     | Tier |
|----------------|--|--------------------------------------------------|-------|--------|--------|--------|-----|------|
| CAP206 Viruses |  | SA-C2                                            | SA-C8 | SA-C62 | SA-C72 | SA-C74 | GMT |      |
| CAP206.TF      |  | 647                                              | 333   | 142    | 549    | 5000   | 609 | 2    |
| CAP206.6mo     |  | 254                                              | 176   | 55     | 265    | 234    | 173 | 2    |
| CAP206.6mo     |  | 316                                              | 88    | 264    | 520    | 499    | 286 | 2    |
| CAP206.12mo    |  | 294                                              | 304   | 70     | 466    | 589    | 280 | 2    |
| CAP206.21mo    |  | 584                                              | 461   | 269    | 1203   | 5000   | 847 | 2    |
| CAP206.24mo    |  | 448                                              | 287   | 178    | 434    | 555    | 353 | 2    |
| CAP206.30mo    |  | 667                                              | 514   | 154    | 765    | 5000   | 726 | 2    |

B

| Animal | Week | B.MN | C.MW965 | C.CAP206.T/F | C.CAP206.2mo | C.CAP206.6mo | CAP206.12mo | CAP206.21mo | CAP206.24mo | CAP206.30mo |
|--------|------|------|---------|--------------|--------------|--------------|-------------|-------------|-------------|-------------|
| 5160   | 0    | <20  | <20     | <20          | <20          | <20          | <20         | <20         | <20         | <20         |
|        | 38   | 990  | 5499    | <20          | 25           | <20          | 28          | <20         | <20         | <20         |
| 5165   | 0    | <20  | <20     | <20          | <20          | <20          | <20         | <20         | <20         | <20         |
|        | 38   | 1036 | 2125    | <20          | <20          | <20          | <20         | <20         | <20         | <20         |
| 5167   | 0    | <20  | <20     | <20          | <20          | <20          | <20         | <20         | <20         | <20         |
|        | 38   | 804  | 1682    | <20          | <20          | <20          | <20         | <20         | <20         | <20         |
| 5173   | 0    | <20  | <20     | <20          | <20          | <20          | <20         | <20         | <20         | <20         |
|        | 38   | 281  | 2464    | <20          | <20          | 437          | <20         | <20         | <20         | <20         |
| 5183   | 0    | <20  | <20     | <20          | <20          | <20          | <20         | <20         | <20         | <20         |
|        | 38   | 579  | 1379    | <20          | <20          | <20          | <20         | <20         | <20         | <20         |
| 5184   | 0    | <20  | <20     | <20          | <20          | <20          | <20         | <20         | <20         | <20         |
|        | 38   | 400  | 1663    | <20          | 38           | <20          | <20         | <20         | <20         | <20         |

**Figure S3. Plasma Neutralization of CAP206 Env-immunized Animals, Related to Figure 1.** (A) Tier phenotype of CAP206 env pseudotyped viruses. CAP206 autologous viruses were tested for neutralization by a characterized panel of sera from clade C HIV infected individuals in the TZM-bl neutralization assay. (B) Plasma neutralization of heterologous tier-1 (B.MN, C.MW965) and autologous tier-2 (CAP206 T/F, 2mo, 6mo, 12mo, 21mo, 24mo, 30mo) before immunization (week 0) and 2 weeks after the last immunization (week 38) measured as the plasma dilution at which relative luminescence units (RLUs) were reduced 50% compared to control wells in the TZM-bl neutralization assay (Yellow,  $\text{ID}_{50} > 20$ ; Orange,  $\text{ID}_{50} > 200$ ; Red,  $\text{ID}_{50} > 1000$ ).

Heavy

|            | <u>CDR1</u>                                            | <u>CDR2</u>                                 | <u>CDR3</u>                         |
|------------|--------------------------------------------------------|---------------------------------------------|-------------------------------------|
| DH427_UCA  | EVQLVESGGG LVQPGGSLRL SCAASGFTFS SYGMSWVRQA PGKGLEWVSY | ISNGGGSTYY ADSVKGRFTI SRDNSKNTLS LQMNSLRAED | TAVYYCAKEG WAYFDYWGQG VLVTVSS       |
| DH427_UCA2 | .....                                                  | .....                                       | .....                               |
| DH427_I1   | .....                                                  | ..IS.....                                   | .....                               |
| DH427      | ..... NS..I.....                                       | ..LS..AN.....                               | .....Q.....V.....M.....S.....F..... |
| DH428      | ..... T.....                                           | ..IS..... T.....                            | .....I.....P.....                   |

Light

|            | <u>CDR1</u>                                 | <u>CDR2</u>                                | <u>CDR3</u>                       |
|------------|---------------------------------------------|--------------------------------------------|-----------------------------------|
| DH427_UCA  | QAALTQPPSV SKSLGQSVTI SCTGTSNDVG GYNDVSWYQQ | HFGTAPRLLI YDVKRPSGV SDRFSGSKSG NTASLTISGL | QAEDEADYIC CSYRSGSTYI FGAGTRLTVL  |
| DH427_UCA2 | .S.....                                     | .....S.I. ....G.....                       | .....S.....E.....G.....           |
| DH427_I1   | .S.....                                     | .....S.I. D..G.....                        | .....S.....T.G.....T.....         |
| DH427      | .S.....                                     | .....S.I. A.TG.....                        | .....S.....TD.....T.A.....T..V... |
| DH428      | .S.....                                     | .....NS.I. D..G.....                       | .....S.....T.G.....T.....         |

Figure S4. Amino Acid Alignment of DH427 Antibody Lineage, Related to Figure 3.

| Virus       | DH427 | DH428 |
|-------------|-------|-------|
| CAP206 T/F  | >50   | >50   |
| CAP206 2mo  | >50   | >50   |
| CAP206 6mo  | 0.02  | 0.02  |
| CAP206 12mo | >50   | >50   |
| CAP206 21mo | >50   | >50   |
| CAP206 24mo | >50   | >50   |
| CAP206 30mo | >50   | >50   |
| B.MN        | >50   | >50   |
| C.MW965     | >50   | >50   |
| C.1086      | >50   | >50   |
| TV1         | >50   | >50   |
| Q842        | >50   | >50   |
| Q23         | >50   | >50   |
| Du172       | >50   | >50   |
| Du422       | >50   | >50   |

**Figure S5. DH427 and DH428 Neutralization of Autologous and Heterologous Viruses in the TZM-bl Assay, Related to Figure 4.** Values are IC50 of neutralization.

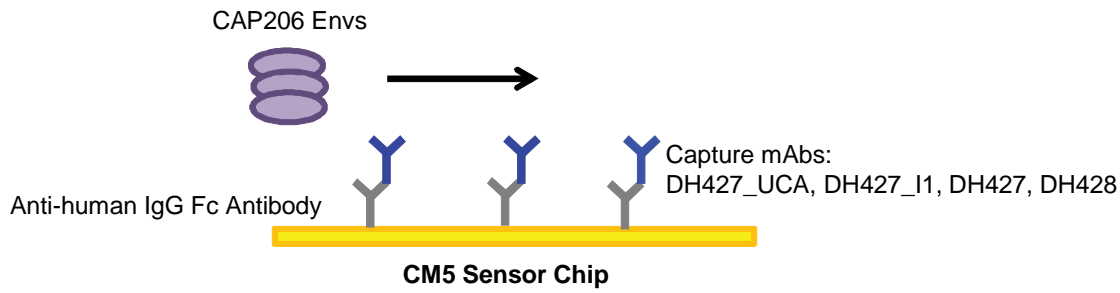

### CAP206 Env gp140 proteins

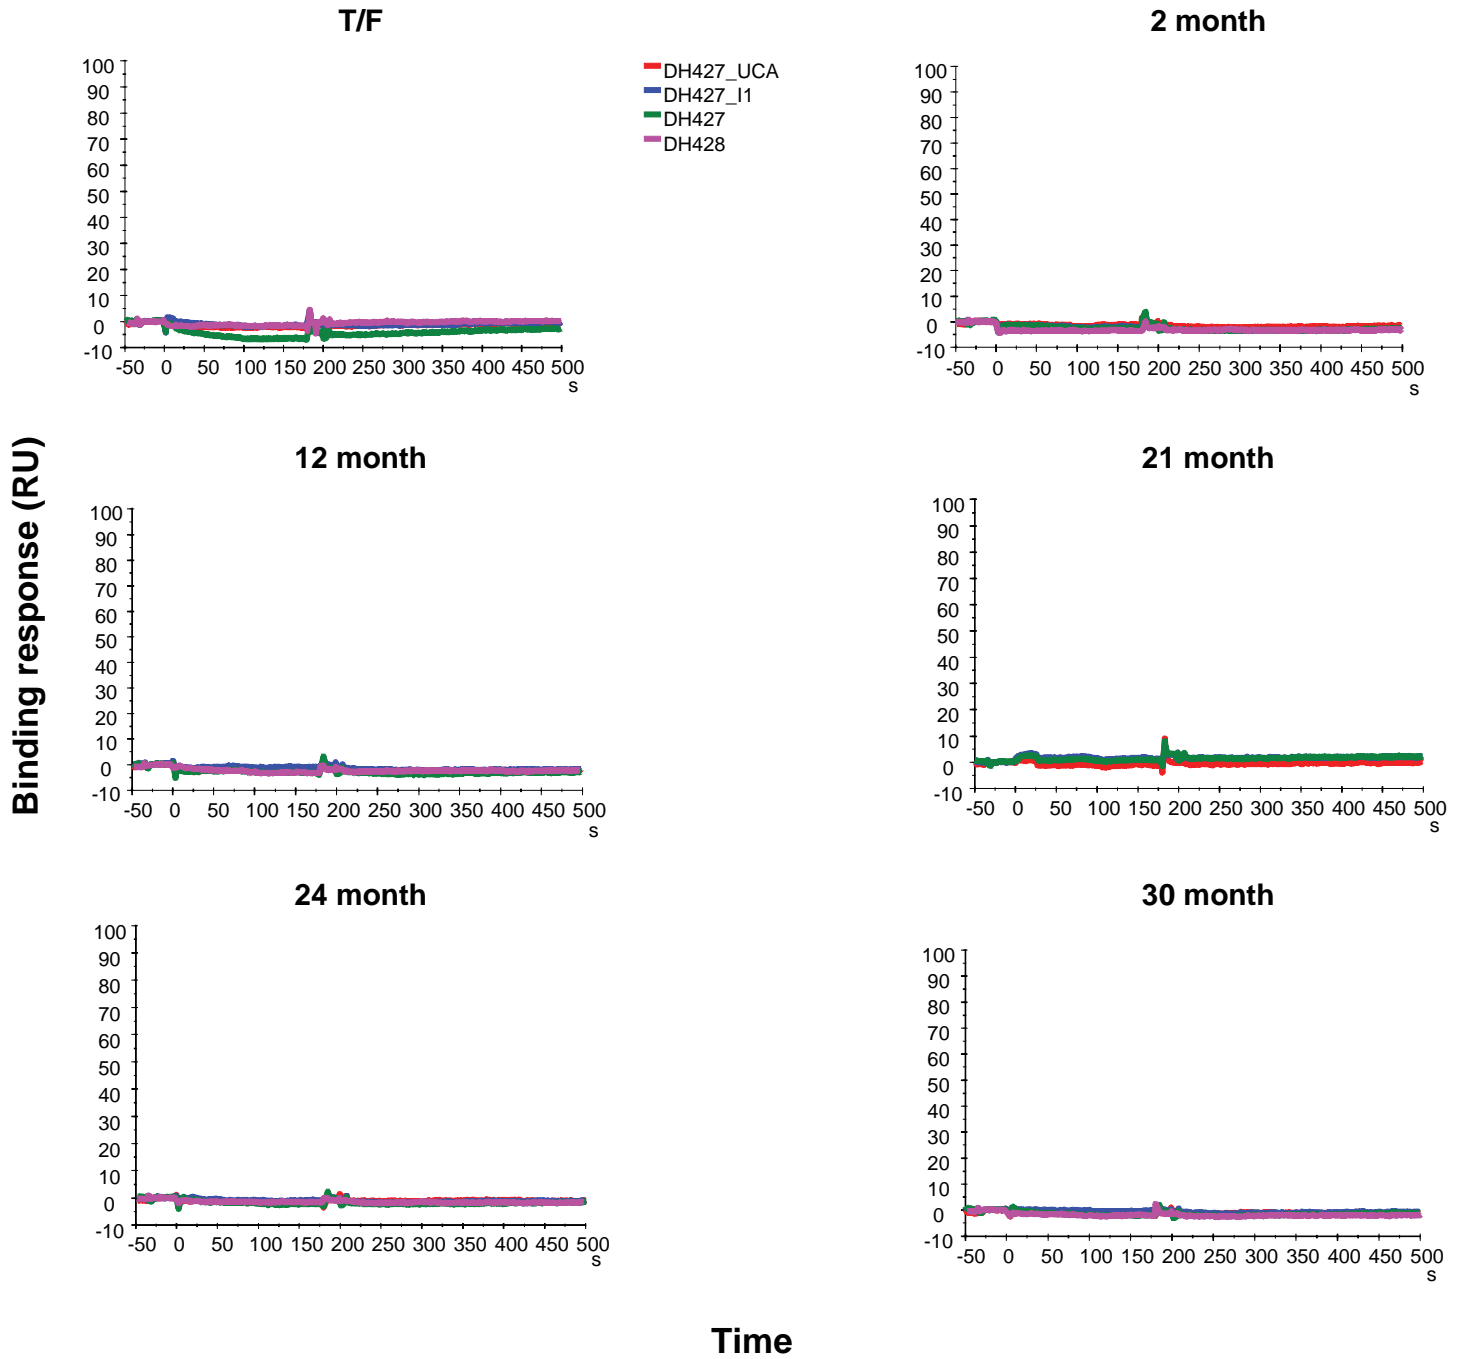

Figure S6. Binding of DH427, DH428 and the Intermediate (I1) and Unmutated Common Ancestor (UCA) to the CAP206 Immunogens by SPR, Related to Figure 5.



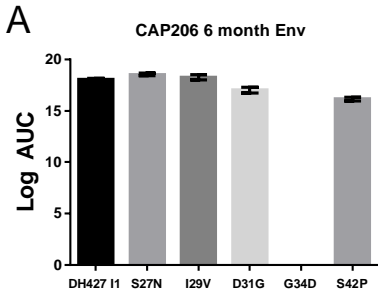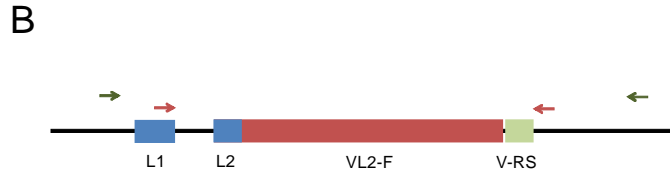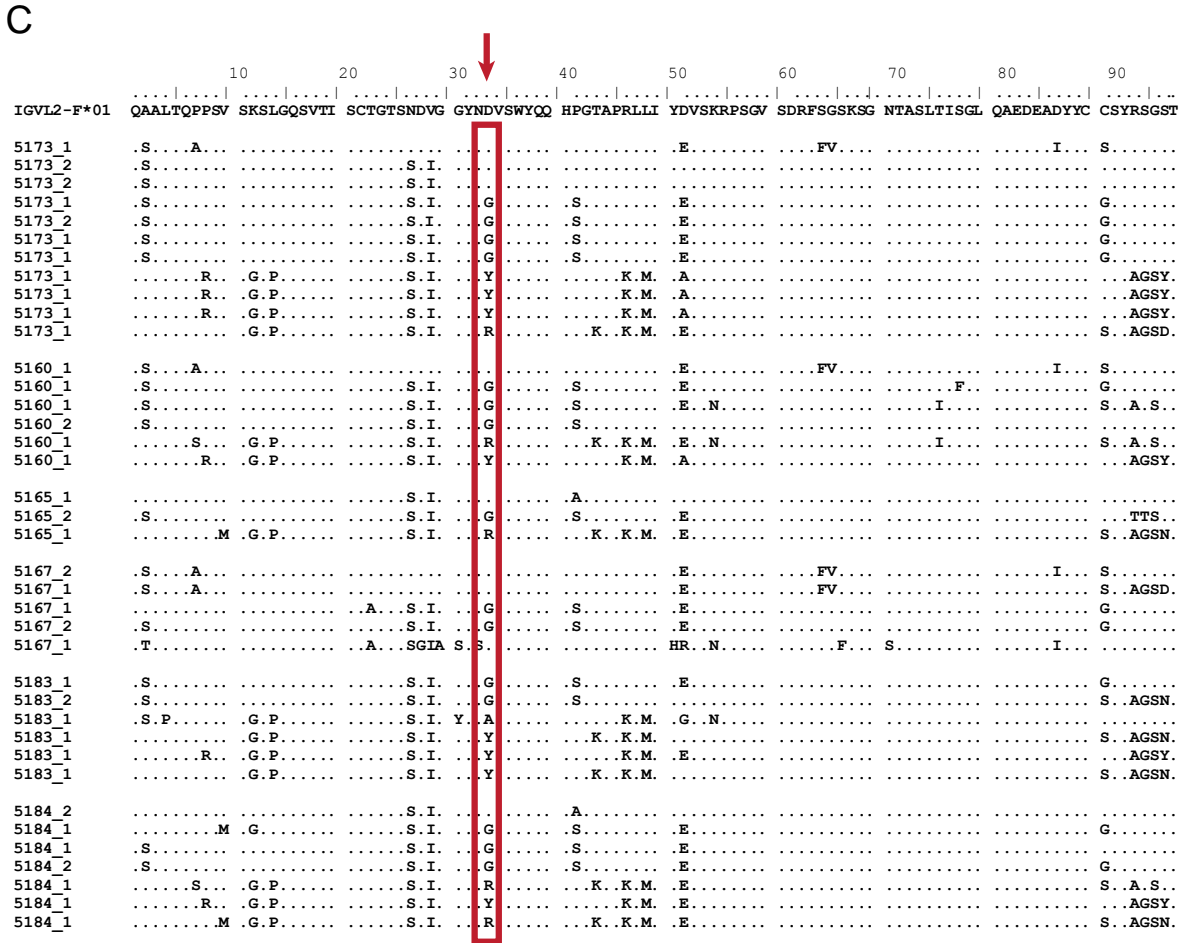

**D**

| Animal  | Week    | SSA | SSB | Sm | RNP | Scl 70 | Jo 1 | dsDNA | Cent B | Histone |
|---------|---------|-----|-----|----|-----|--------|------|-------|--------|---------|
| 5160    | 0       | 3   | 9   | 6  | 5   | 5      | 4    | 18    | 9      | 7       |
| 5165    | 0       | 5   | 6   | 12 | 16  | 28     | 8    | 51    | 14     | 19      |
| 5167    | 0       | 3   | 4   | 6  | 11  | 8      | 8    | 27    | 5      | 9       |
| 5173    | 0       | 9   | 18  | 5  | 25  | 24     | 13   | 33    | 7      | 12      |
| 5183    | 0       | 3   | 6   | 10 | 20  | 7      | 5    | 45    | 12     | 15      |
| 5184    | 0       | 8   | 6   | 8  | 7   | 46     | 10   | 33    | 10     | 12      |
| 5160    | 38      | 3   | 4   | 7  | 11  | 4      | 10   | 28    | 7      | 10      |
| 5165    | 38      | 5   | 7   | 6  | 20  | 12     | 6    | 37    | 9      | 12      |
| 5167    | 38      | 2   | 7   | 5  | 6   | 13     | 4    | 15    | 3      | 4       |
| 5173    | 38      | 7   | 10  | 8  | 48  | 20     | 22   | 28    | 12     | 13      |
| 5183    | 38      | 7   | 9   | 7  | 7   | 8      | 6    | 47    | 5      | 11      |
| 5184    | 38      | 5   | 7   | 8  | 5   | 20     | 10   | 24    | 3      | 6       |
| 4E10    | 50µg/ml | 122 | 190 | 10 | 13  | 5      | 186  | 5     | 7      | 18      |
| Synagis | 50µg/ml | 4   | 6   | 4  | 2   | 2      | 6    | 2     | 2      | 2       |

**E**

| Antibody (50µg/ml) | SSA | SSB | Sm | RNP | Scl 70 | Jo 1 | dsDNA | Cent B | Histone |
|--------------------|-----|-----|----|-----|--------|------|-------|--------|---------|
| DH427              |     |     |    |     |        |      |       |        |         |
| UCA2               | 7   | 18  | 4  | 4   | 5      | 13   | 14    | 47     | 15      |
| DH427 I1           | 3   | 4   | 2  | 2   | 2      | 3    | 12    | 2      | 4       |
| DH427              | 3   | 3   | 3  | 2   | 2      | 2    | 8     | 3      | 2       |
| DH428              | 4   | 5   | 3  | 5   | 4      | 4    | 19    | 7      | 7       |
| 4E10               | 100 | 192 | 5  | 31  | 11     | 210  | 0     | 19     | 29      |
| Synagis            | 5   | 10  | 3  | 2   | 3      | 8    | 8     | 10     | 5       |

**Figure S7. Sequencing Genomic DNA to Identify Genomic V<sub>L</sub> Protein Sequences, Related to Figure 5** (A) Binding of DH427 I1 and DH427 I1 with light chain mutations to the CAP206 6 month Env measured by ELISA. (B) the primer design for determination of IGVL2-F sequences are shown with leader sequences (blue), coding sequence (red), V recombination site (V-RS; green) and noncoding genomic regions (black). 2 primer sets were used to ensure amplification of unrearranged germ-line DNA (green and red arrows). (C) Amino acid sequence alignments of germ-line IGVL2-F alleles from all 6 CAP206 animals compared with the annotated IGVL20F allele. 1 indicates sequences amplified with primer set 1 (green) and 2 indicated sequences amplified with primer set 2 (red). Red box highlights residue critical for DH427 binding to the CAP206 Env. (D-E) Plasma (D) and DH427 antibody lineage (E) screened for reactivity with auto-antigens in the AtheNA ANA assay. Values greater than 100 considered positive (orange), and 4E10 (auto-reactive HIV mAb) and Synagis (RSV-specific mAb) used as positive and negative control, respectively.

**Table S1. DH427UCA2 Reactive Host Proteins, Related to Figure 5.**

| Description                                                             | DH427UCA2 MFI | Control MFI |
|-------------------------------------------------------------------------|---------------|-------------|
| family with sequence similarity 21, member C (FAM21C)                   | 6195          | -6          |
| family with sequence similarity 21, member C (FAM21C)                   | 6490          | -6          |
| G-protein signaling modulator 3 (AGS3-like, <i>C. elegans</i> ) (GPSM3) | 3085          | 5           |
| G-protein signaling modulator 3 (AGS3-like, <i>C. elegans</i> ) (GPSM3) | 2824          | 44          |
| SNAP25-interacting protein (SNIP)                                       | 1057          | 27          |
| SNAP25-interacting protein (SNIP)                                       | 1645          | 3           |
| nuclear gene encoding mitochondrial protein(ATP5H)                      | 1230          | 4           |
| nuclear gene encoding mitochondrial protein (ATP5H)                     | 1203          | 18          |
| WD repeat domain 45 (WDR45), transcript variant 1                       | 452           | 1           |
| WD repeat domain 45 (WDR45), transcript variant 1                       | 584           | 16          |
| regulator of G-protein signaling 8 (RGS8), transcript variant 1         | 2709          | 87          |
| regulator of G-protein signaling 8 (RGS8), transcript variant 1         | 2961          | 90          |
| lactate dehydrogenase A (LDHA)                                          | 1086          | 29          |
| lactate dehydrogenase A (LDHA)                                          | 868           | 10          |
| Microtubule-associated serine/threonine-protein kinase-like             | 323           | 89          |
| Microtubule-associated serine/threonine-protein kinase-like             | 9011          | 126         |

**Table S2. Data Collection and Refinement Statistics, Related to Figure 6.**

|                                                         | DH427                                         | DH428                           | DH427/gp120 core             |
|---------------------------------------------------------|-----------------------------------------------|---------------------------------|------------------------------|
| <b>Data collection</b>                                  |                                               |                                 |                              |
| Space group                                             | P2 <sub>1</sub> 2 <sub>1</sub> 2 <sub>1</sub> | P2 <sub>1</sub> 22 <sub>1</sub> | P6 <sub>4</sub>              |
| Cell dimensions                                         |                                               |                                 |                              |
| <i>a, b, c</i> (Å)                                      | 78.6, 154.2, 163.6                            | 73.1, 74.6, 102.6               | 162.9, 162.9, 229.9          |
| $\alpha, \beta, \gamma$ (°)                             | 90, 90, 90                                    | 90, 90, 90                      | 90, 90, 120                  |
| Resolution (Å)                                          | 49.02 – 2.69<br>(2.74 – 2.69)*                | 74.63 – 2.37<br>(2.41 – 2.37)   | 141.08 – 6.63<br>(6.80-6.63) |
| <i>R</i> <sub>sym</sub> or <i>R</i> <sub>merge</sub>    | 17.1 (92.2)                                   | 8.6 (74.4)                      | 27.3 (233.1)                 |
| <i>I</i> / $\sigma$ <i>I</i>                            | 7.0 (1.3)                                     | 14.6 (2.2)                      | 7.9 (1.1)                    |
| Completeness (%)                                        | 95.1 (85.5)                                   | 92.4 (95.0)                     | 93.7 (94.1)                  |
| Redundancy                                              | 4.8 (4.7)                                     | 4.0 (3.9)                       | 6.7 (6.6)                    |
| <b>Refinement</b>                                       |                                               |                                 |                              |
| Resolution (Å)                                          | 48.90 - 2.66                                  | 60.36 – 2.32                    | 141.08 – 6.63                |
| No. reflections                                         | 55460                                         | 22892                           | 5756                         |
| <i>R</i> <sub>work</sub> / <i>R</i> <sub>free</sub> (%) | 23.4/26.8                                     | 23.9/26.4                       | 34.2/36.5                    |
| No. atoms                                               | 13104                                         | 3232                            | 11602                        |
| Protein                                                 | 12644                                         | 3167                            | 11602                        |
| Water                                                   | 460                                           | 65                              | 0                            |
| <i>B</i> -factors                                       |                                               |                                 |                              |
| Protein                                                 | 19.9                                          | 49.9                            | 2.1                          |
| Solvent                                                 | 17.6                                          | 49.4                            | --                           |
| R.m.s. deviations                                       |                                               |                                 |                              |
| Bond lengths (Å)                                        | 0.004                                         | 0.006                           | 0.013                        |
| Bond angles (°)                                         | 0.91                                          | 1.12                            | 1.81                         |

\*Values in parentheses are for highest-resolution shell. One crystal was used for data collection for the DH428 Fab. Multiple crystals were used for DH427 and the complex.
